# Supplementary material for: A Survey of Didemnin Depsipeptide Production in Tistrella
Source: MDPI journal article supplement (doi:10.3390/md21020056), 2023-01-17

## SUPPORTING INFORMATION

### A Survey of Didemnins Depsipeptide Production in *Tistrella*

Robert J. Stankey,<sup>1</sup> Don Johnson,<sup>1</sup> Brendan M. Duggan,<sup>2</sup> David A. Mead<sup>1,\*</sup> and James J. La Clair,<sup>3,4,\*</sup>

<sup>1</sup> Terra Bioworks Inc., Middleton, Wisconsin, 53562, United States

<sup>2</sup> Skaggs School of Pharmacy and Pharmaceutical Sciences, University of California, San Diego,  
9500 Gilman Drive, La Jolla, California, 92093, United States

<sup>3</sup> Department of Chemistry and Biochemistry, University of California at San Diego, La Jolla, California,  
92093-0358, United States

<sup>4</sup> Xenobe Research Institute, P. O. Box 3052, San Diego, CA 92163-1052

\* Correspondence: dmead@teraabioworks.com (D.A.M.) or i@xenobe.org (J.J.L.)

<sup>1</sup>H-NMR (600 MHz) spectrum of didemnin B in CD<sub>3</sub>OD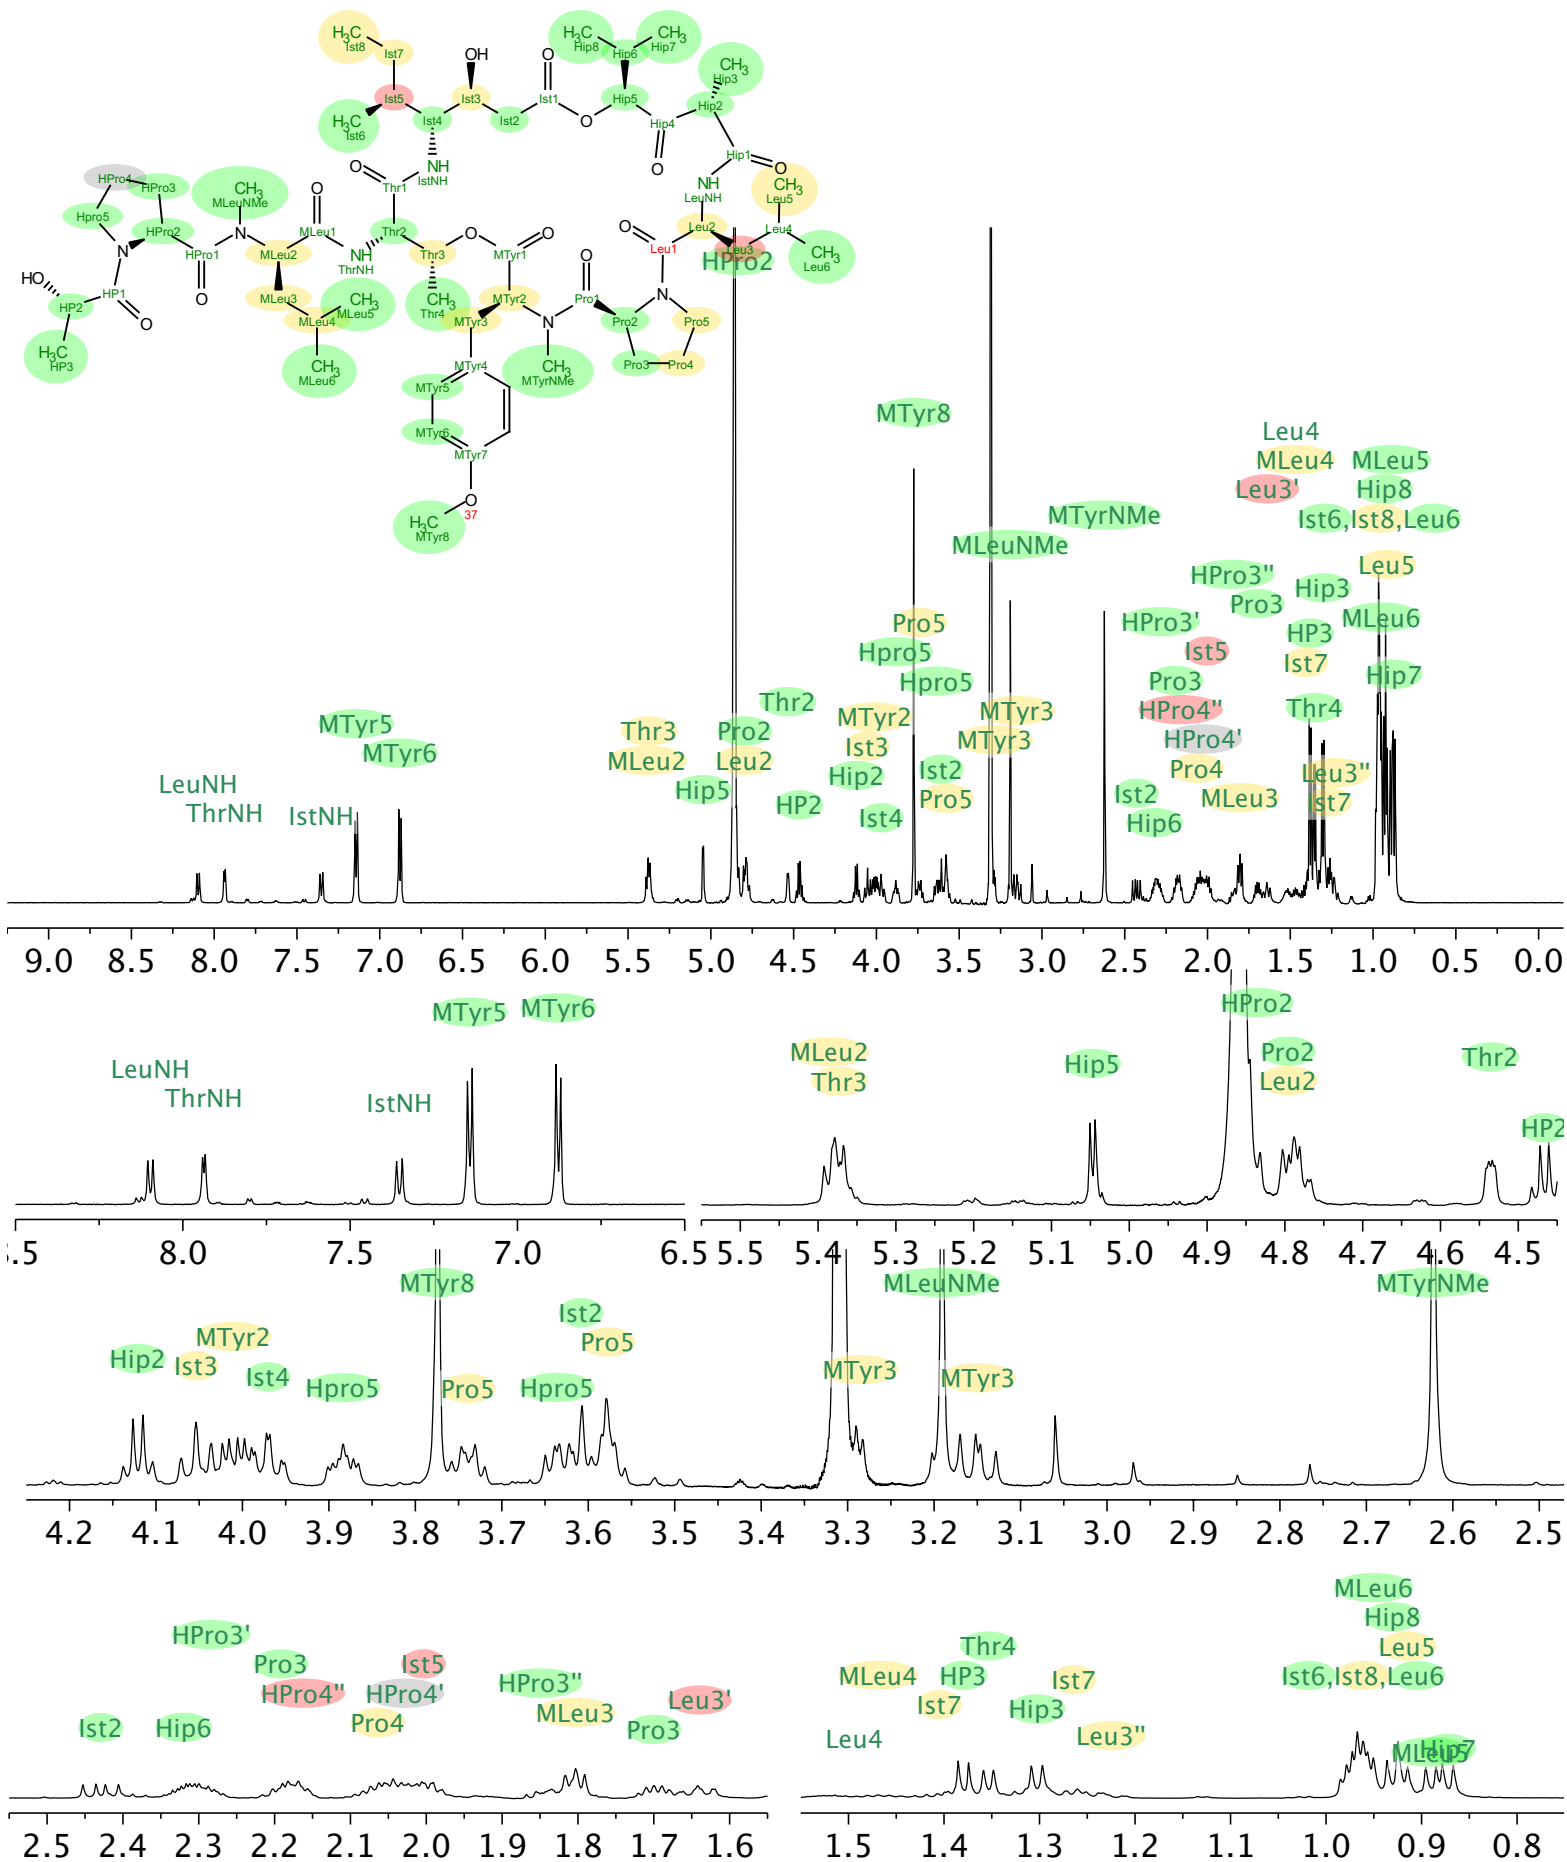

$^1\text{H}$ ,  $^1\text{H}$ -COSY (600 MHz) spectrum of didemnin B in  $\text{CD}_3\text{OD}$

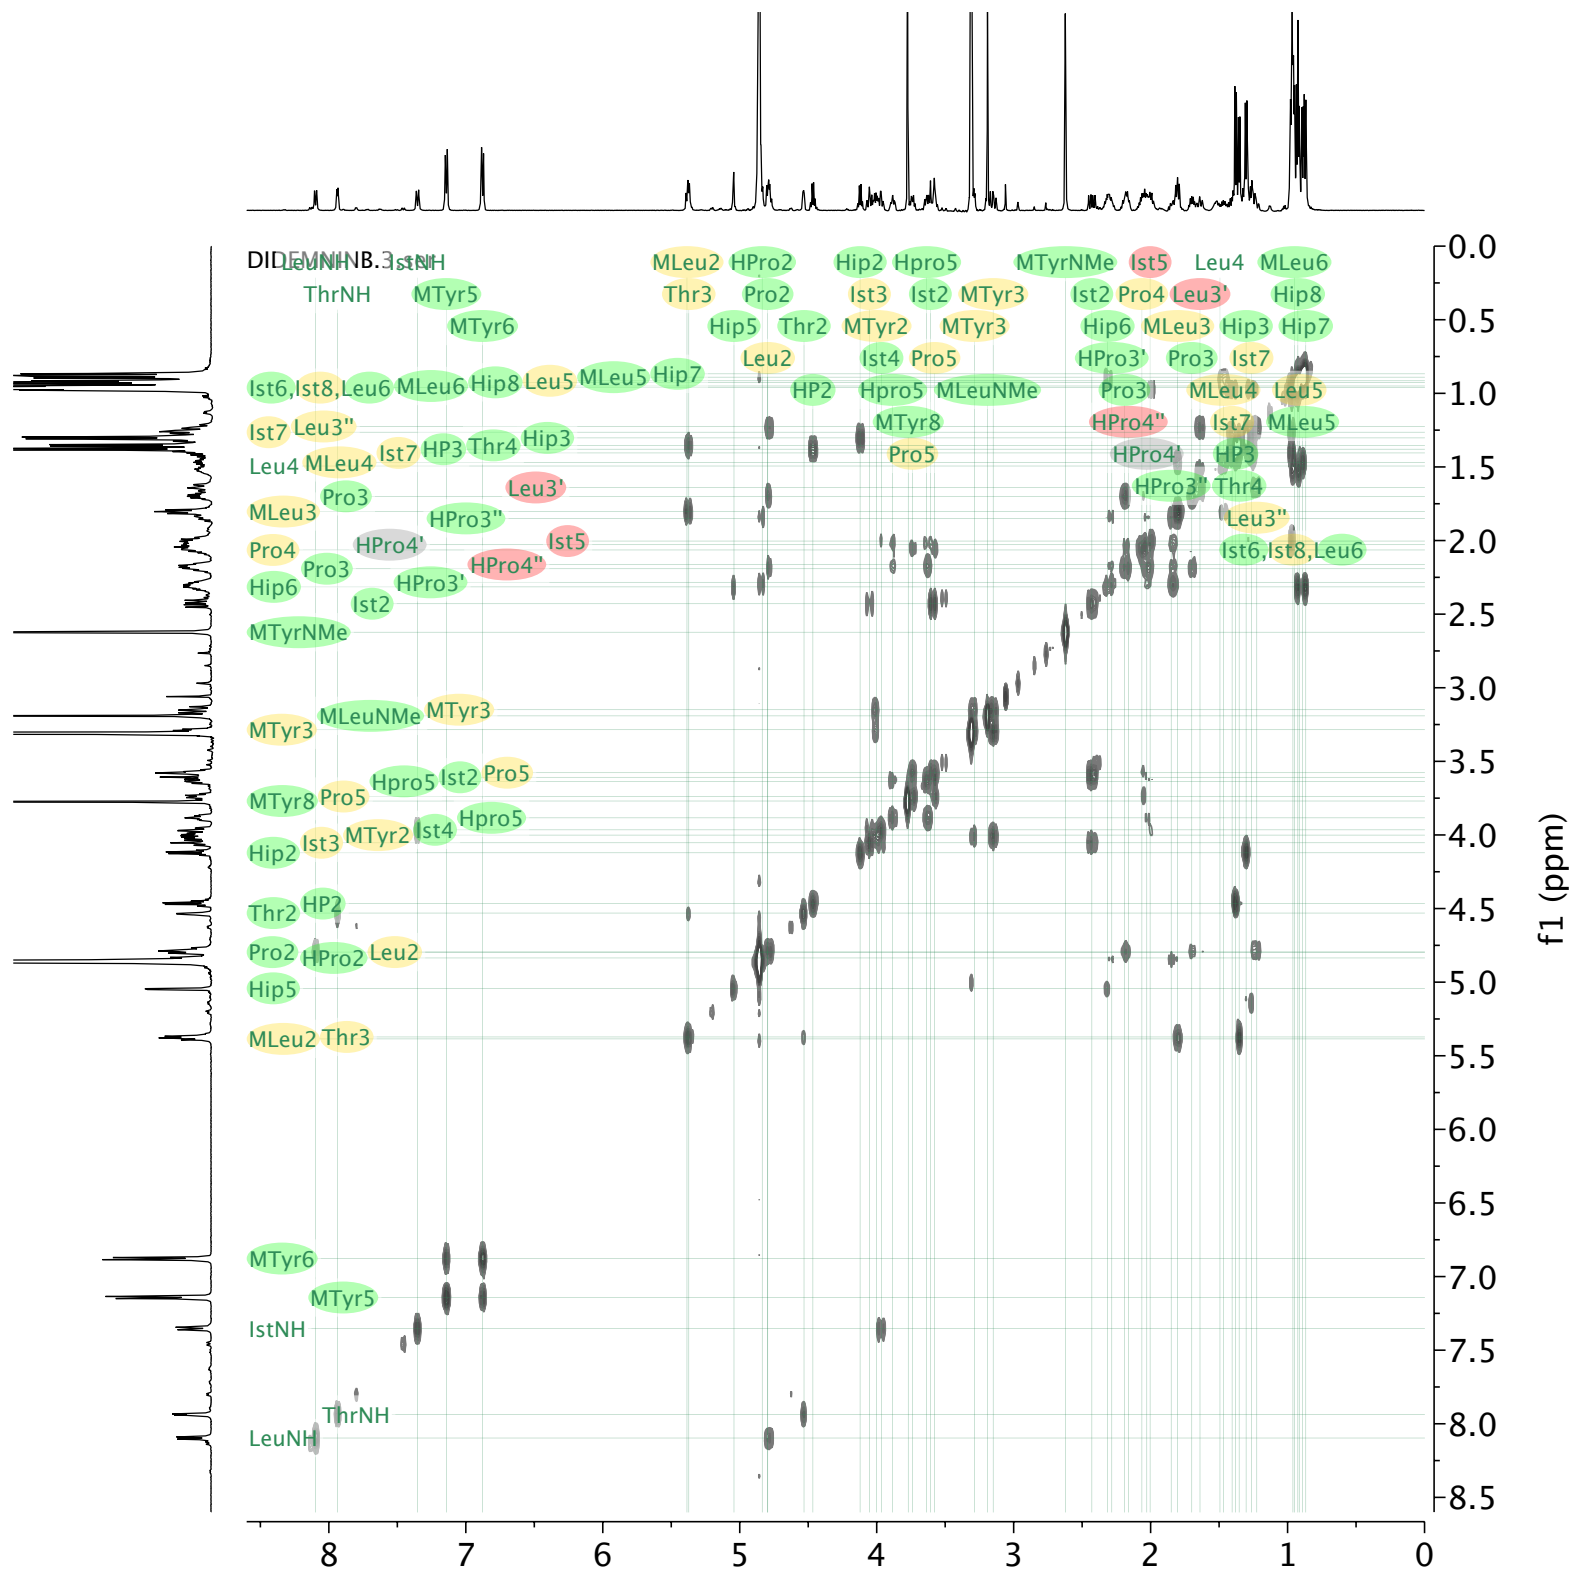

$^1\text{H}, ^{13}\text{C}$ -HSQC (600 MHz) spectrum of didemnin B in  $\text{CD}_3\text{OD}$

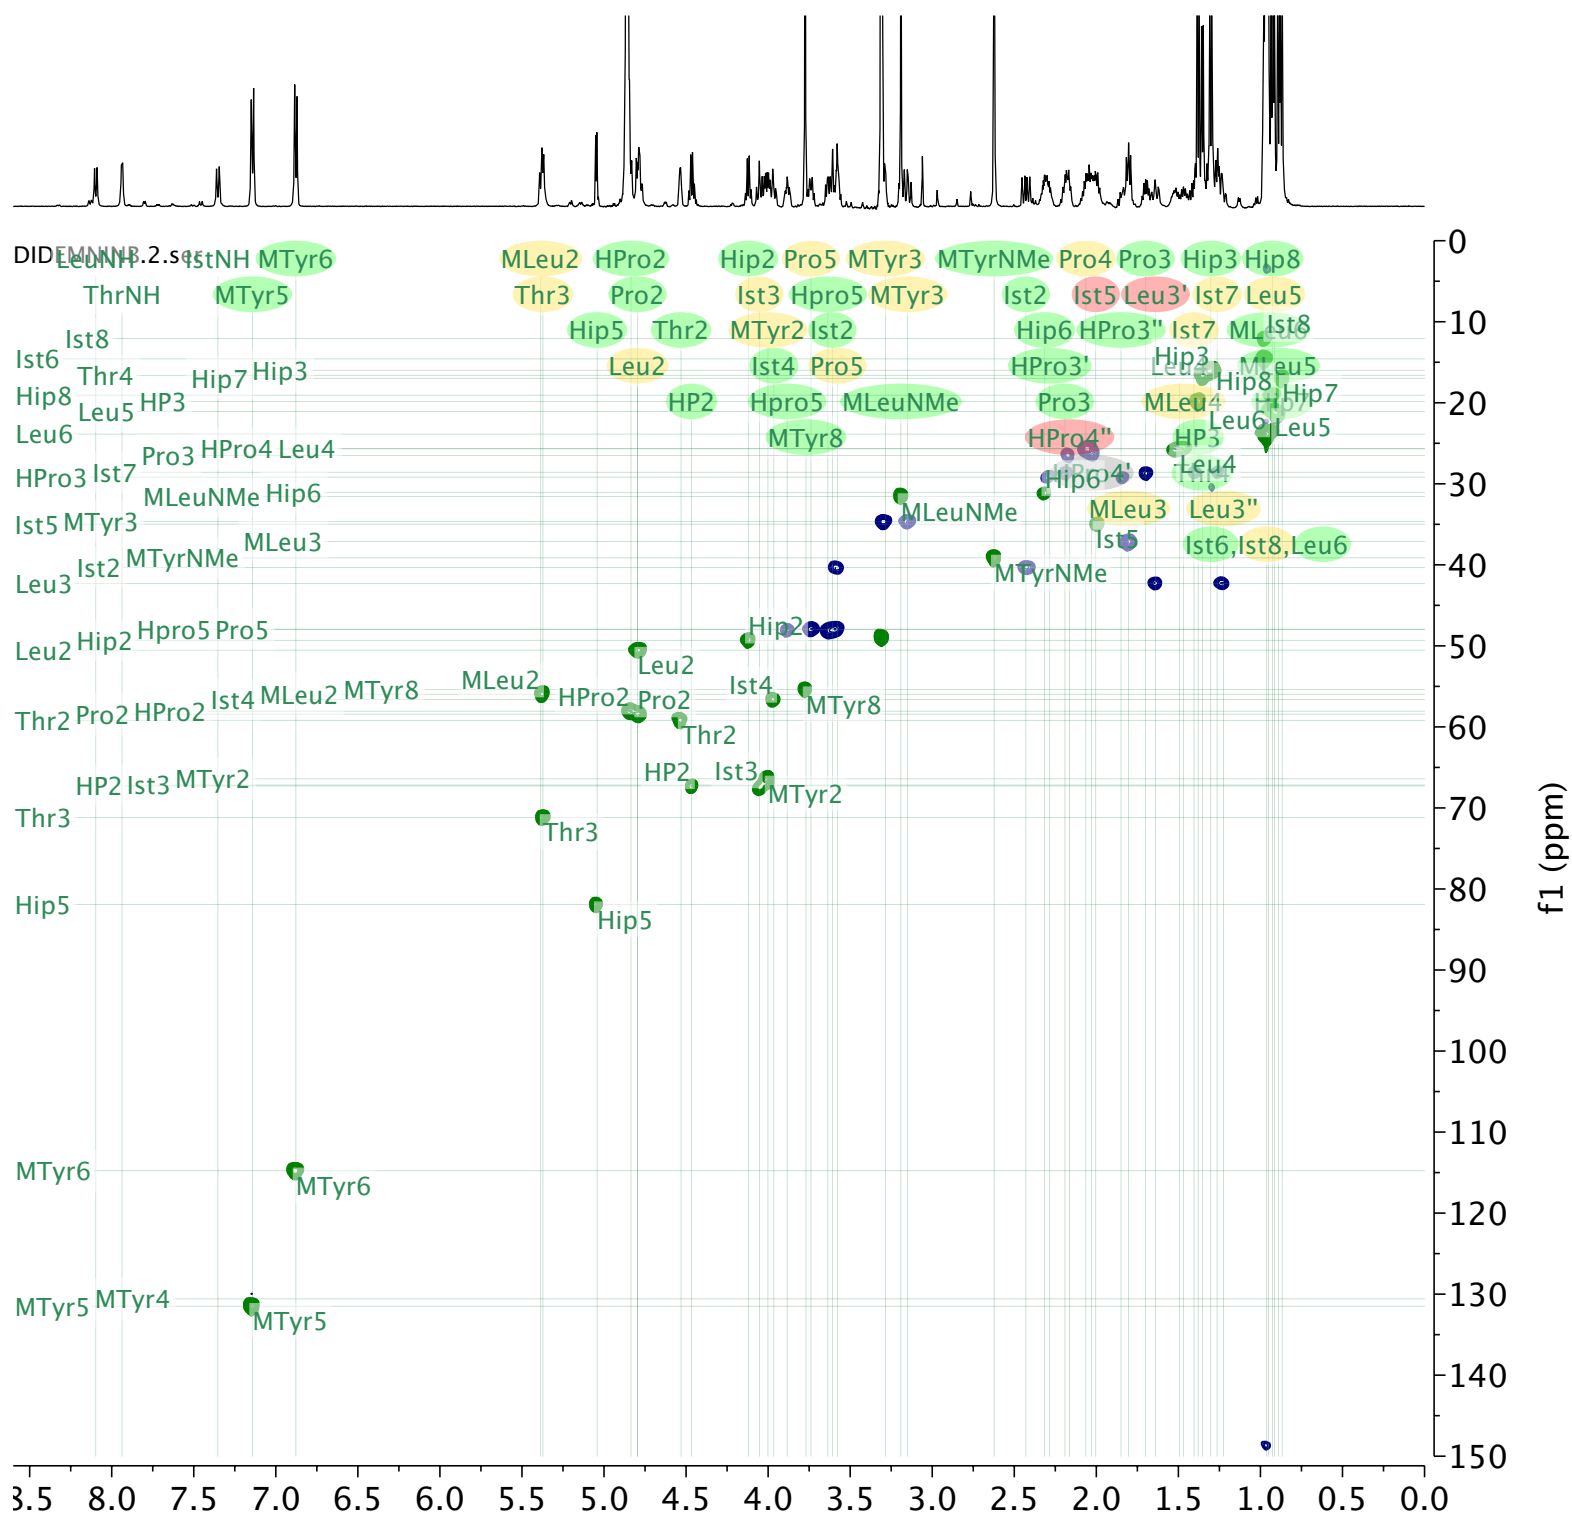

$^1\text{H}, ^{13}\text{C}$ -HMBC (600 MHz) spectrum of didemnin B in  $\text{CD}_3\text{OD}$

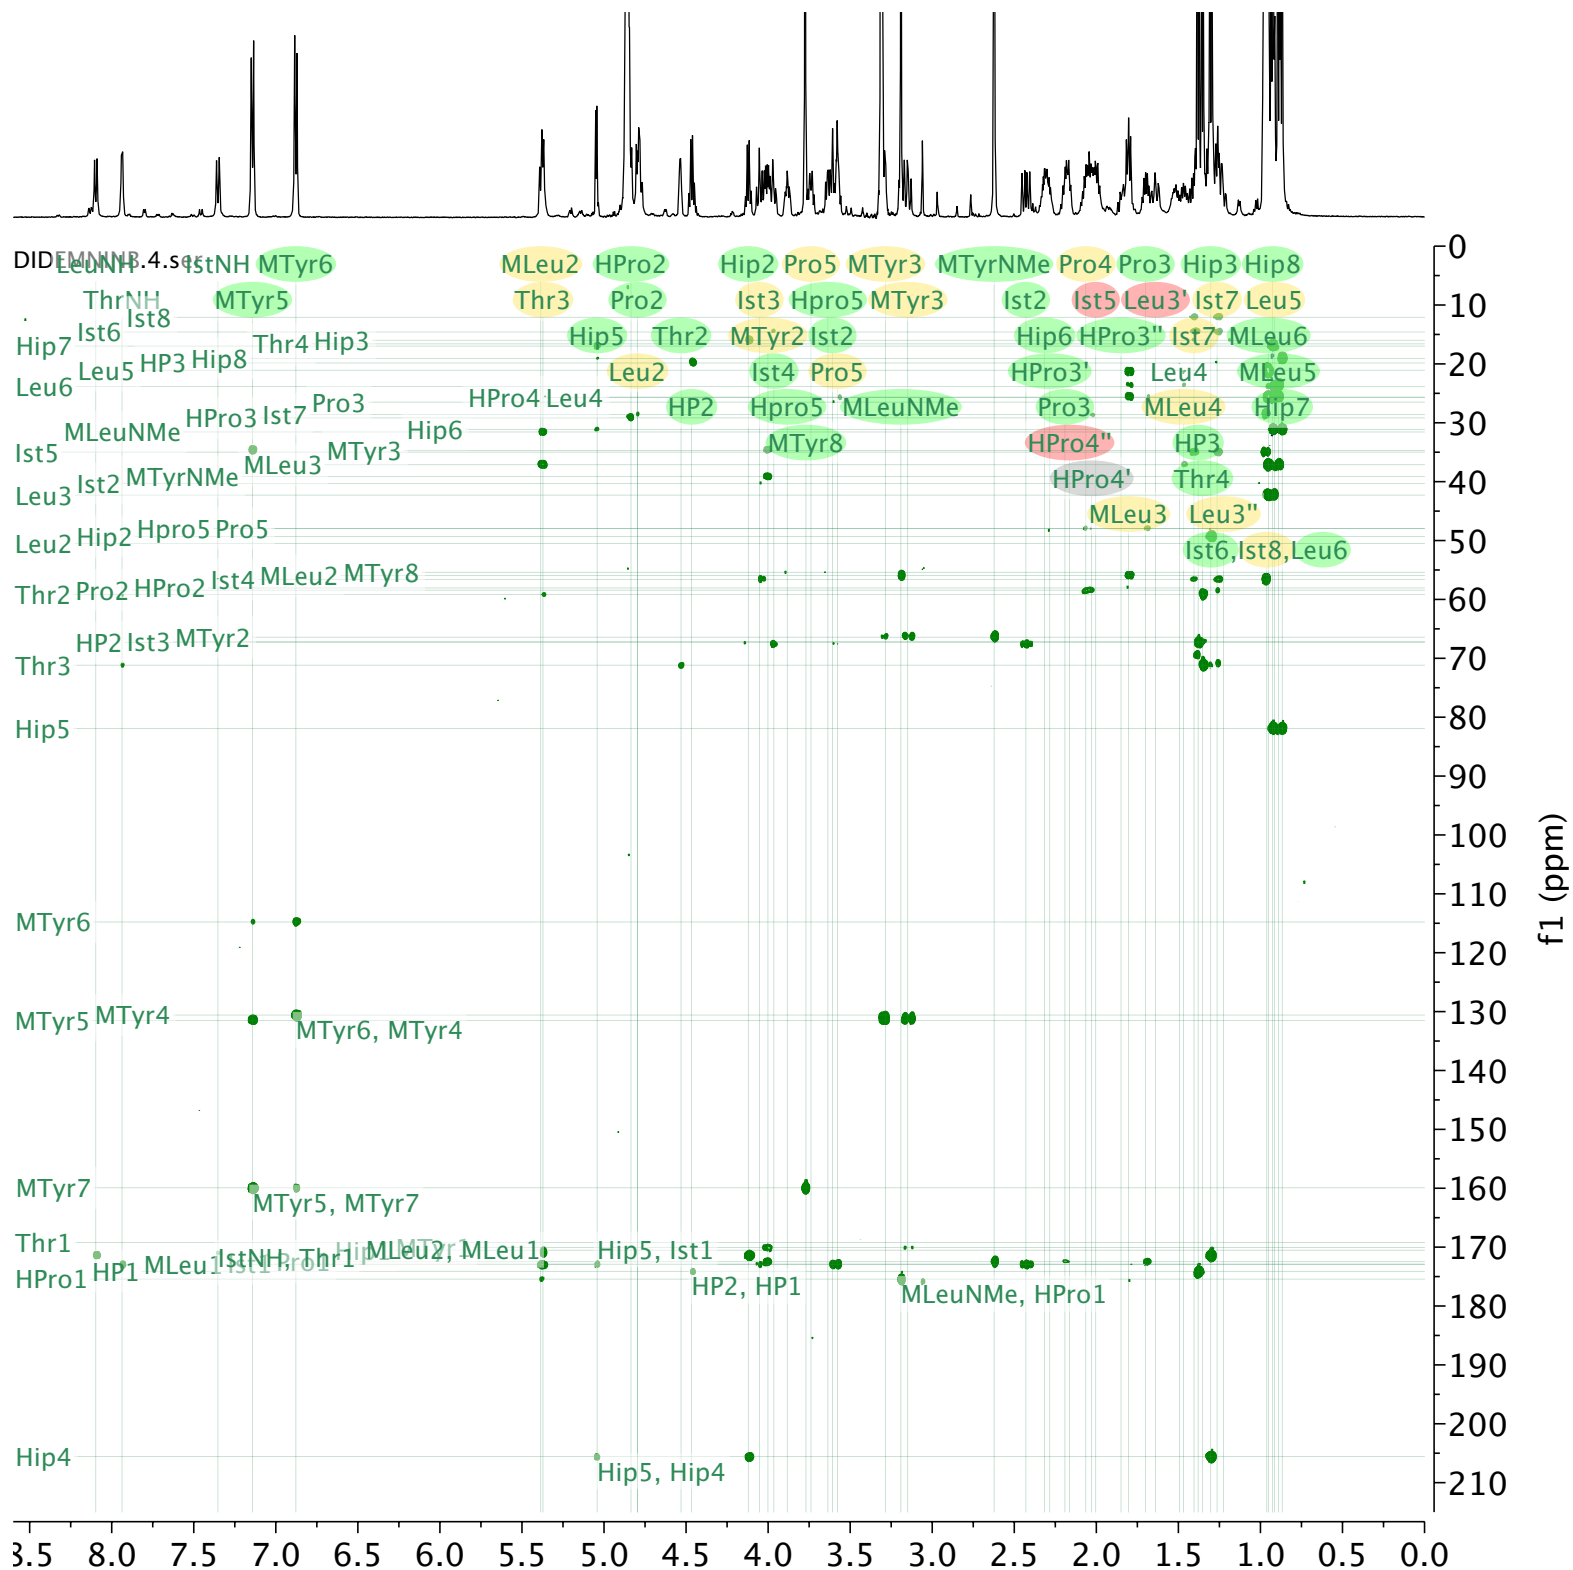

$^1\text{H}$ -NMR (600 MHz) spectra of extracts from cultures **K** - **R** as compared to didemnin B in  $\text{CD}_3\text{OD}$

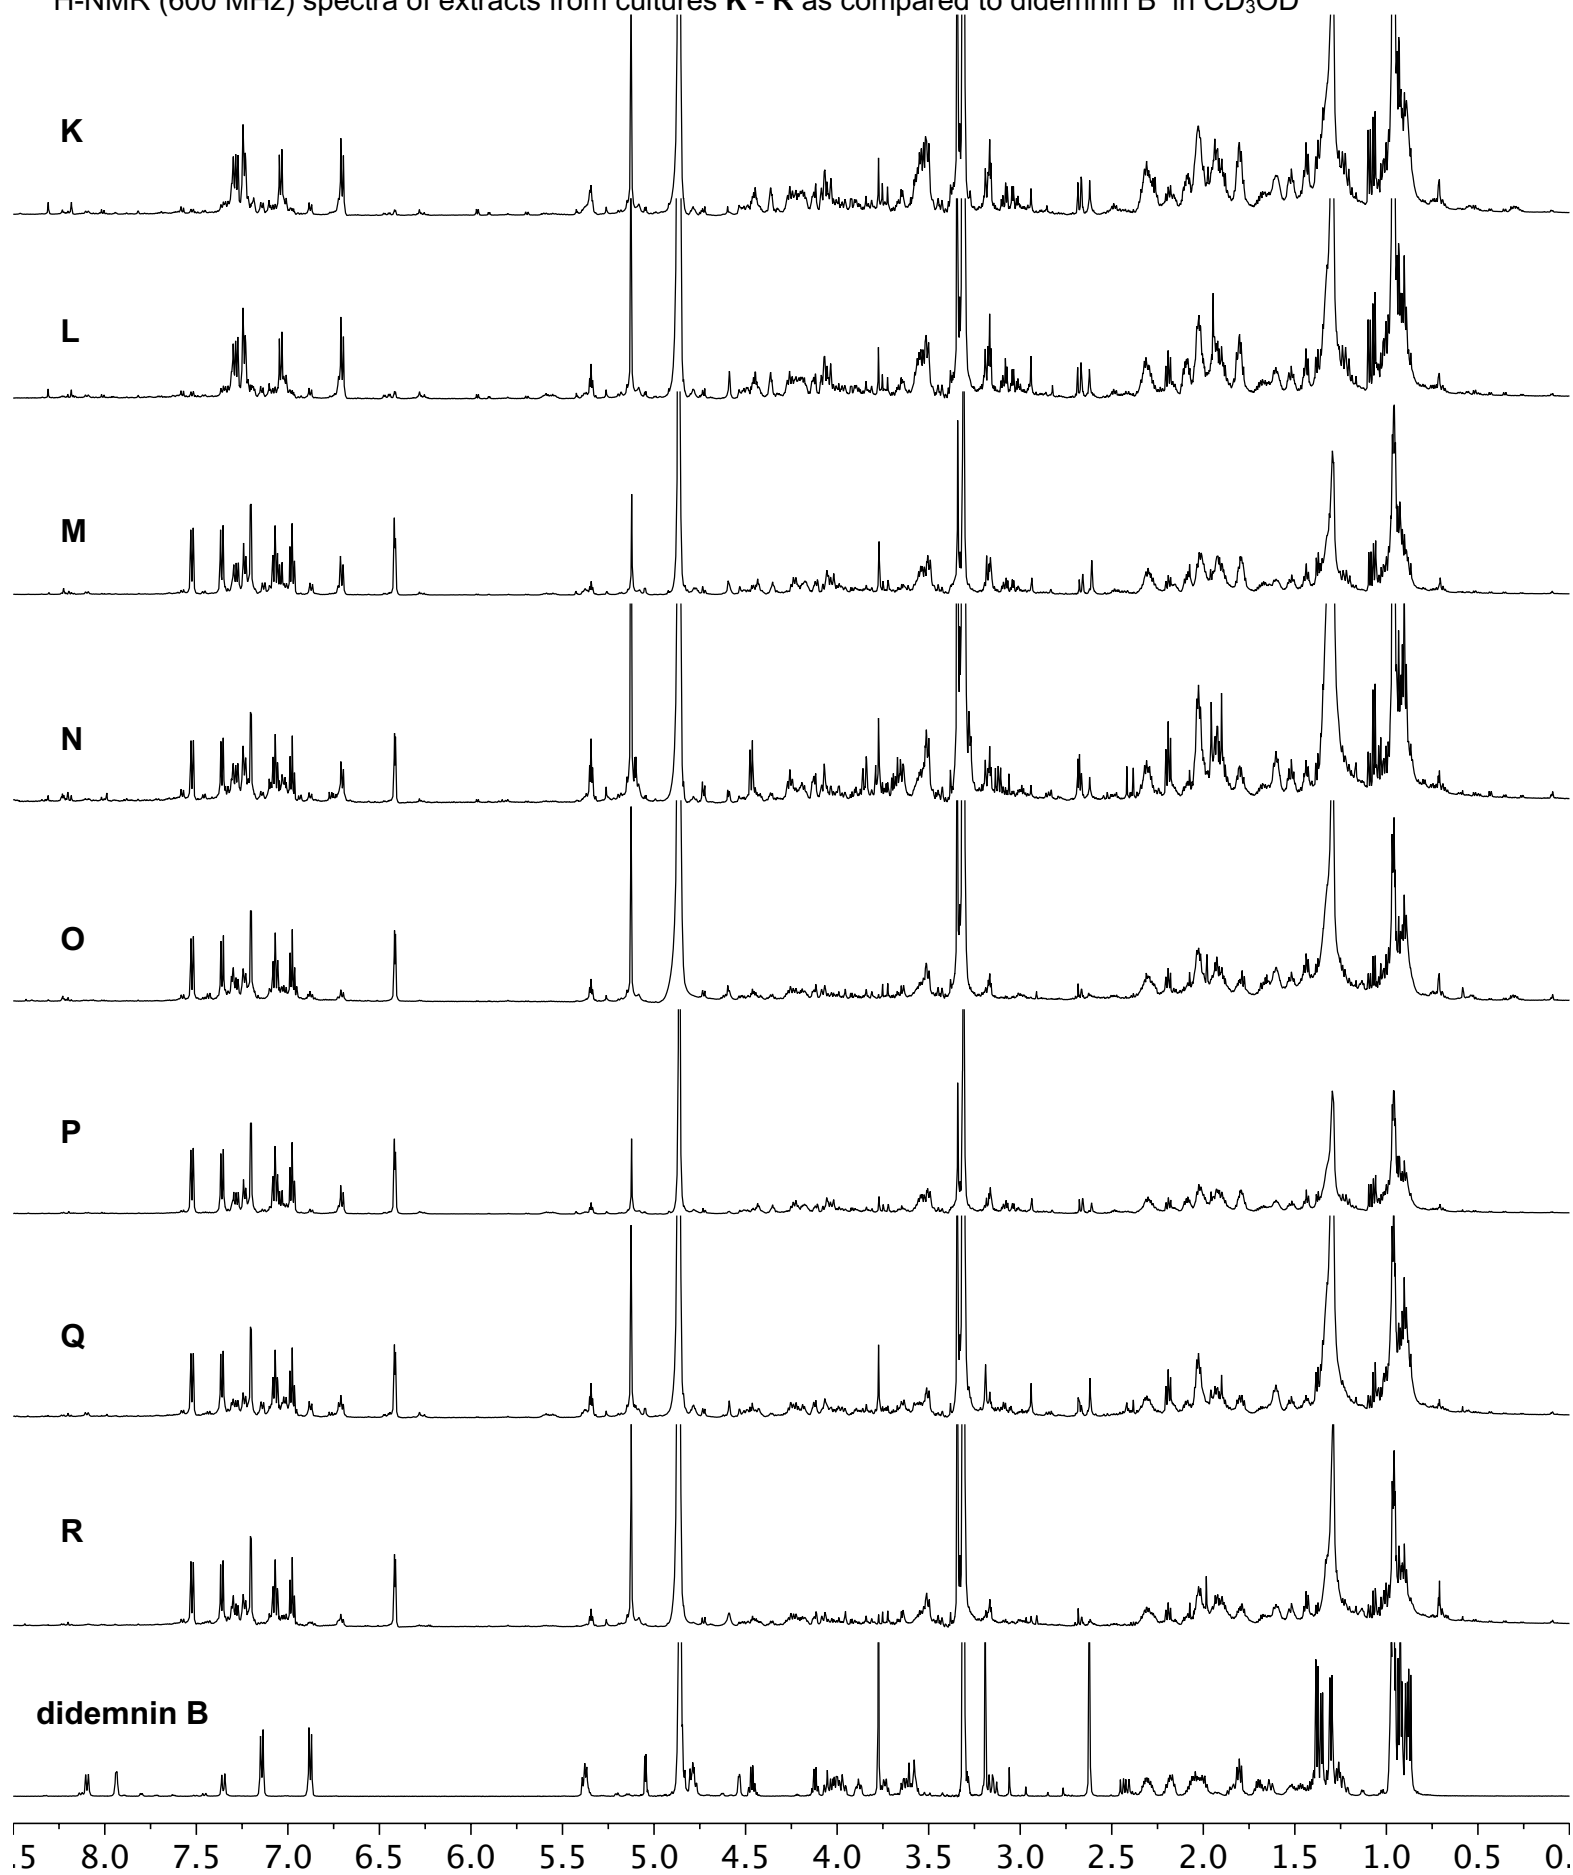

<sup>1</sup>H-NMR (600 MHz) spectra of extracts from cultures **K - R** as compared to didemnin B in CD<sub>3</sub>OD

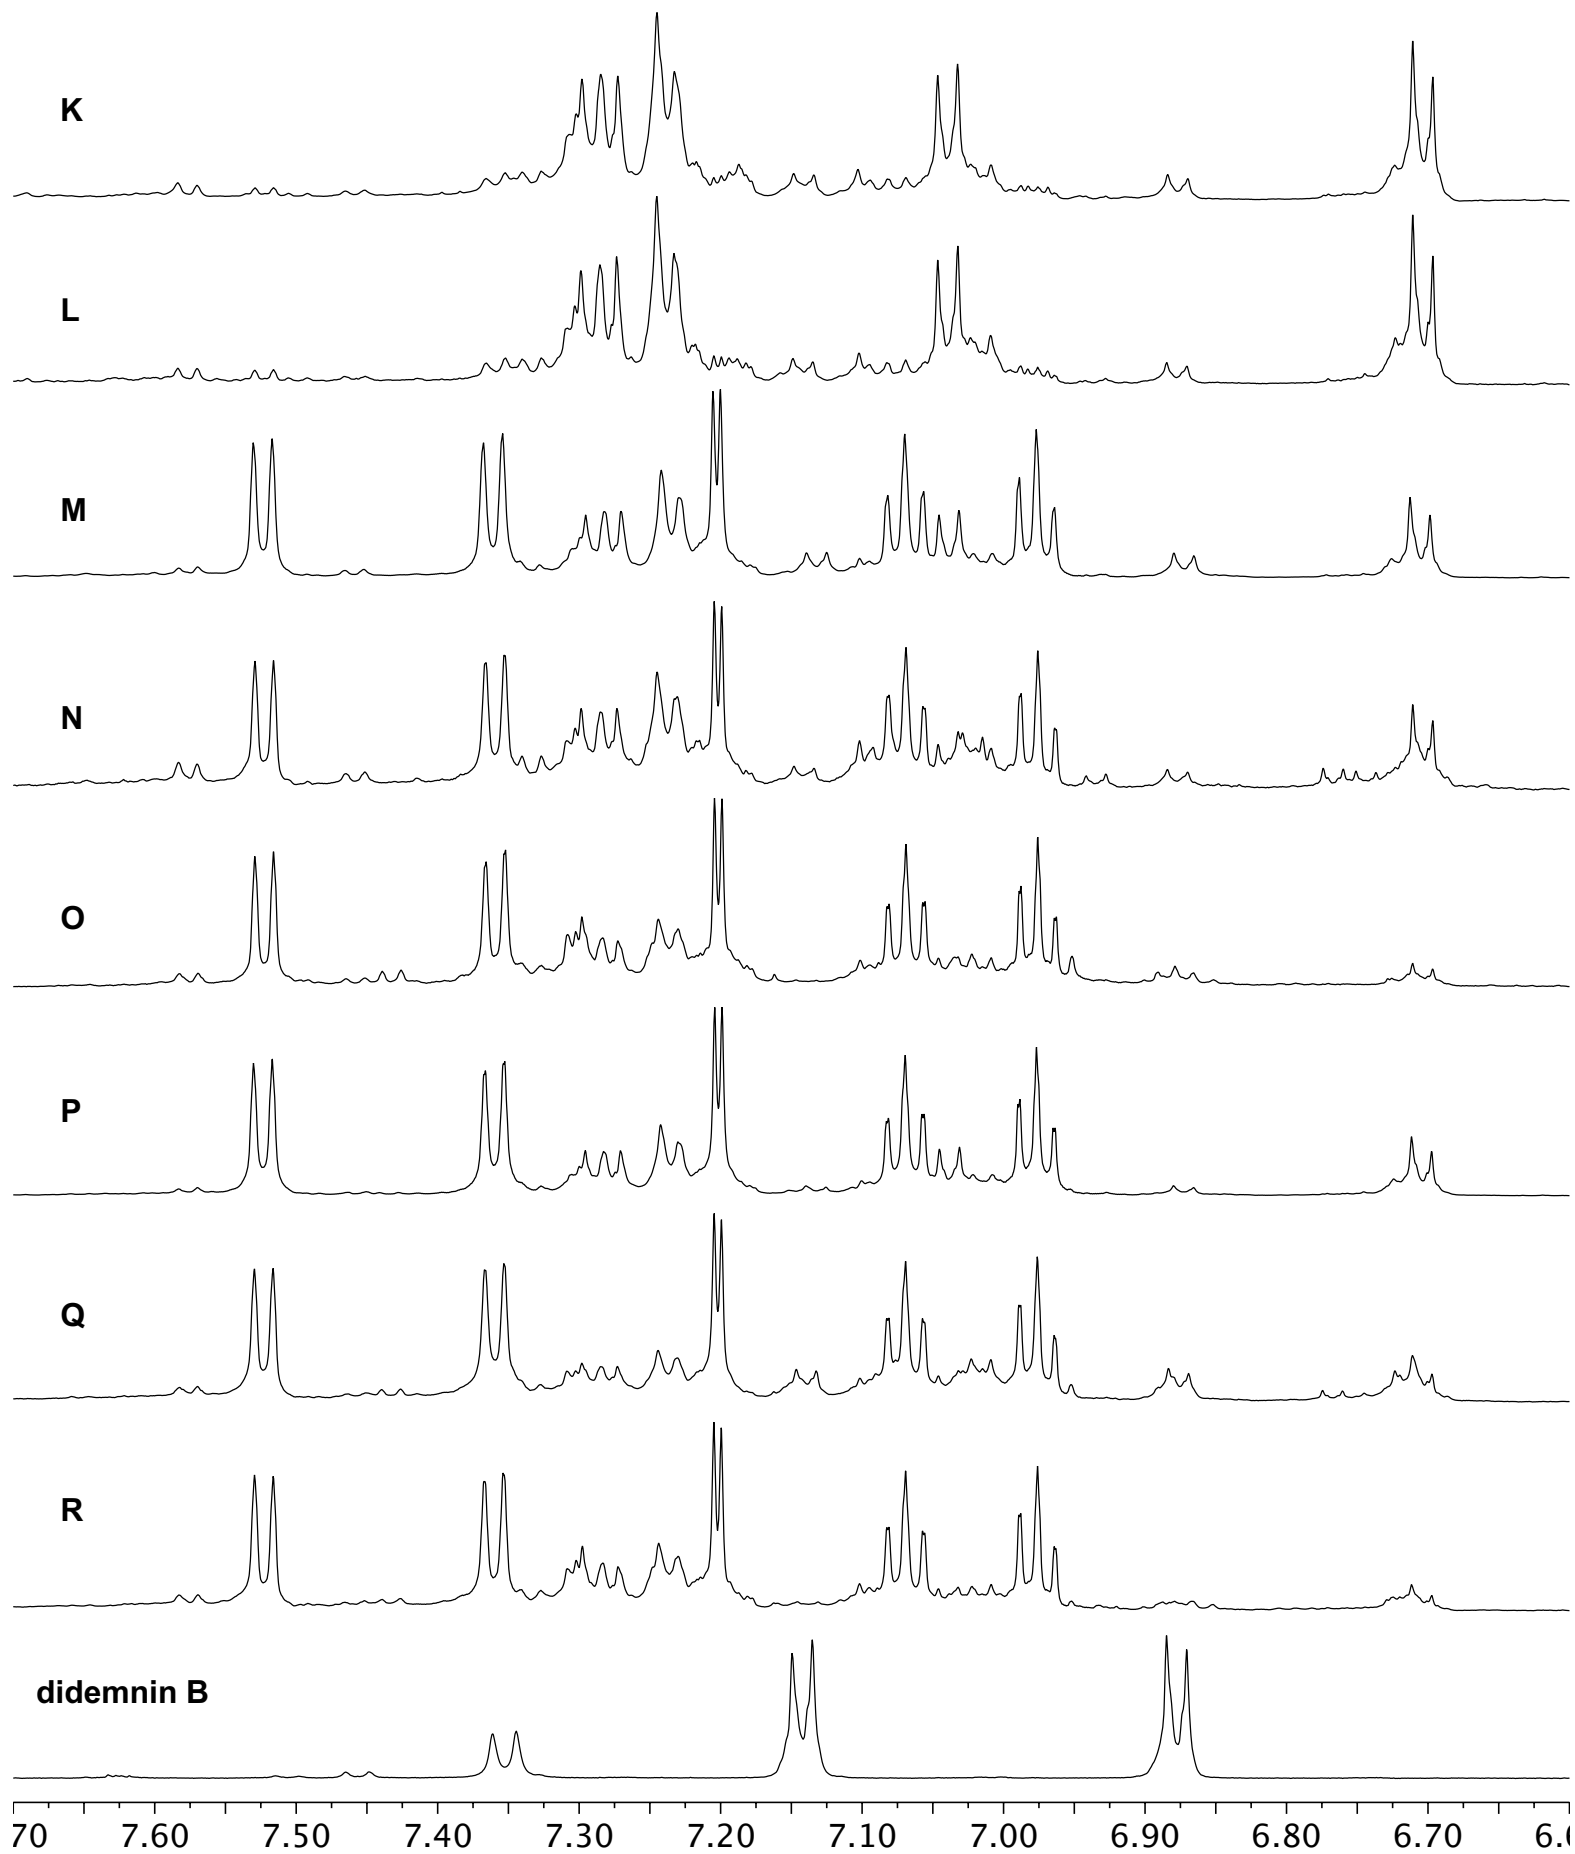

<sup>1</sup>H-NMR (600 MHz) spectra of extracts from cultures **K - R** as compared to didemnin B in CD<sub>3</sub>OD

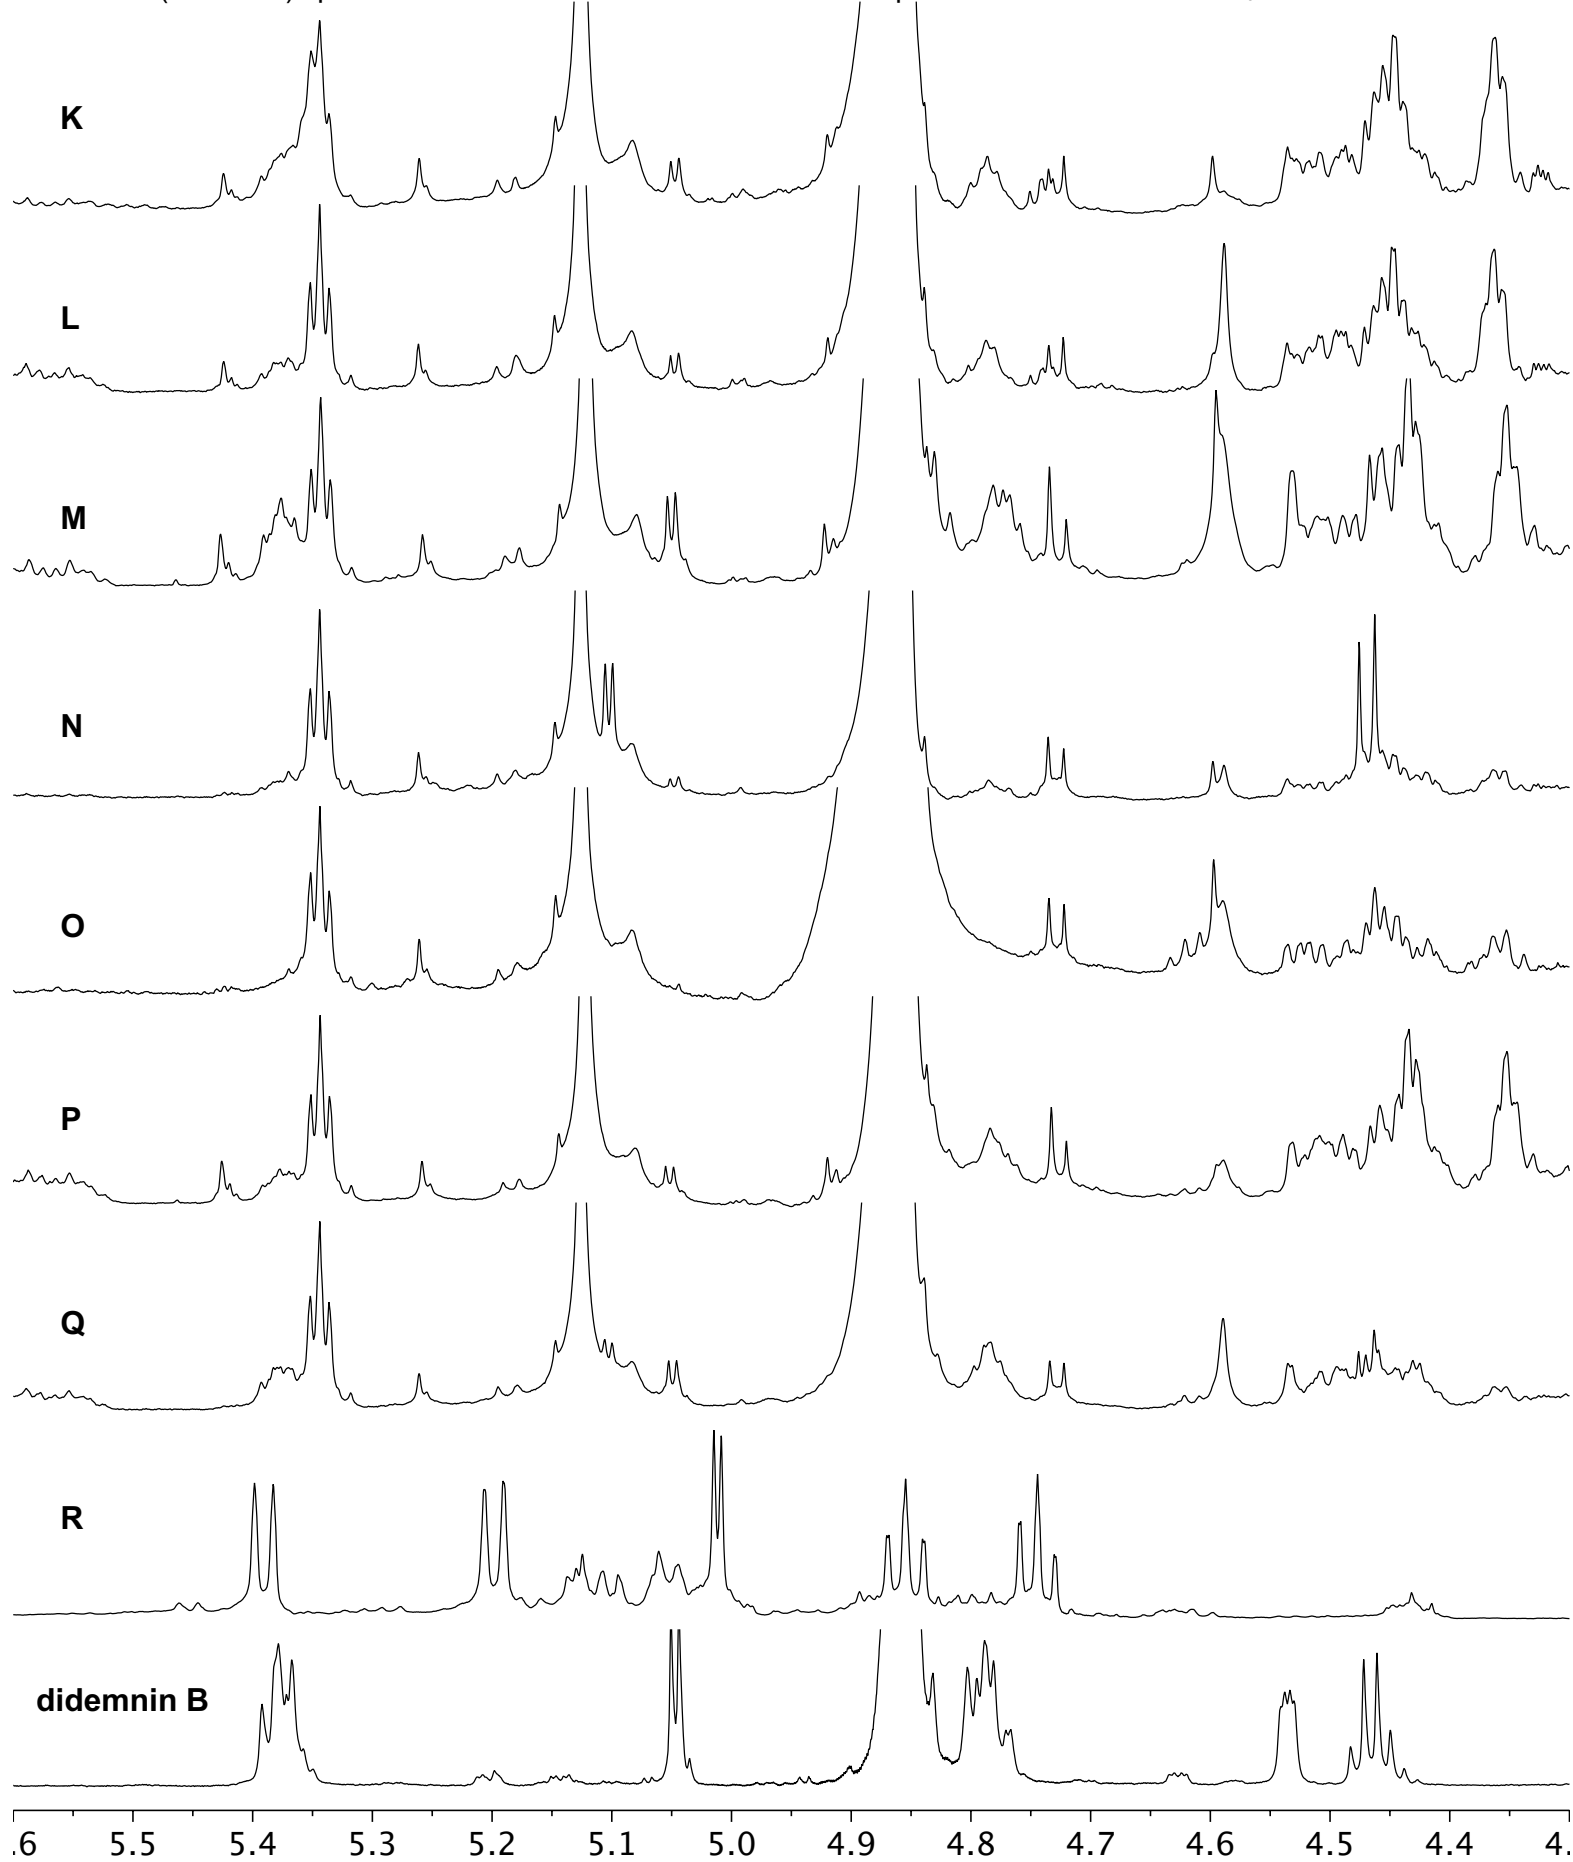

$^1\text{H}$ -NMR (600 MHz) spectra of extracts from cultures **K** - **R** as compared to didemnin B in  $\text{CD}_3\text{OD}$

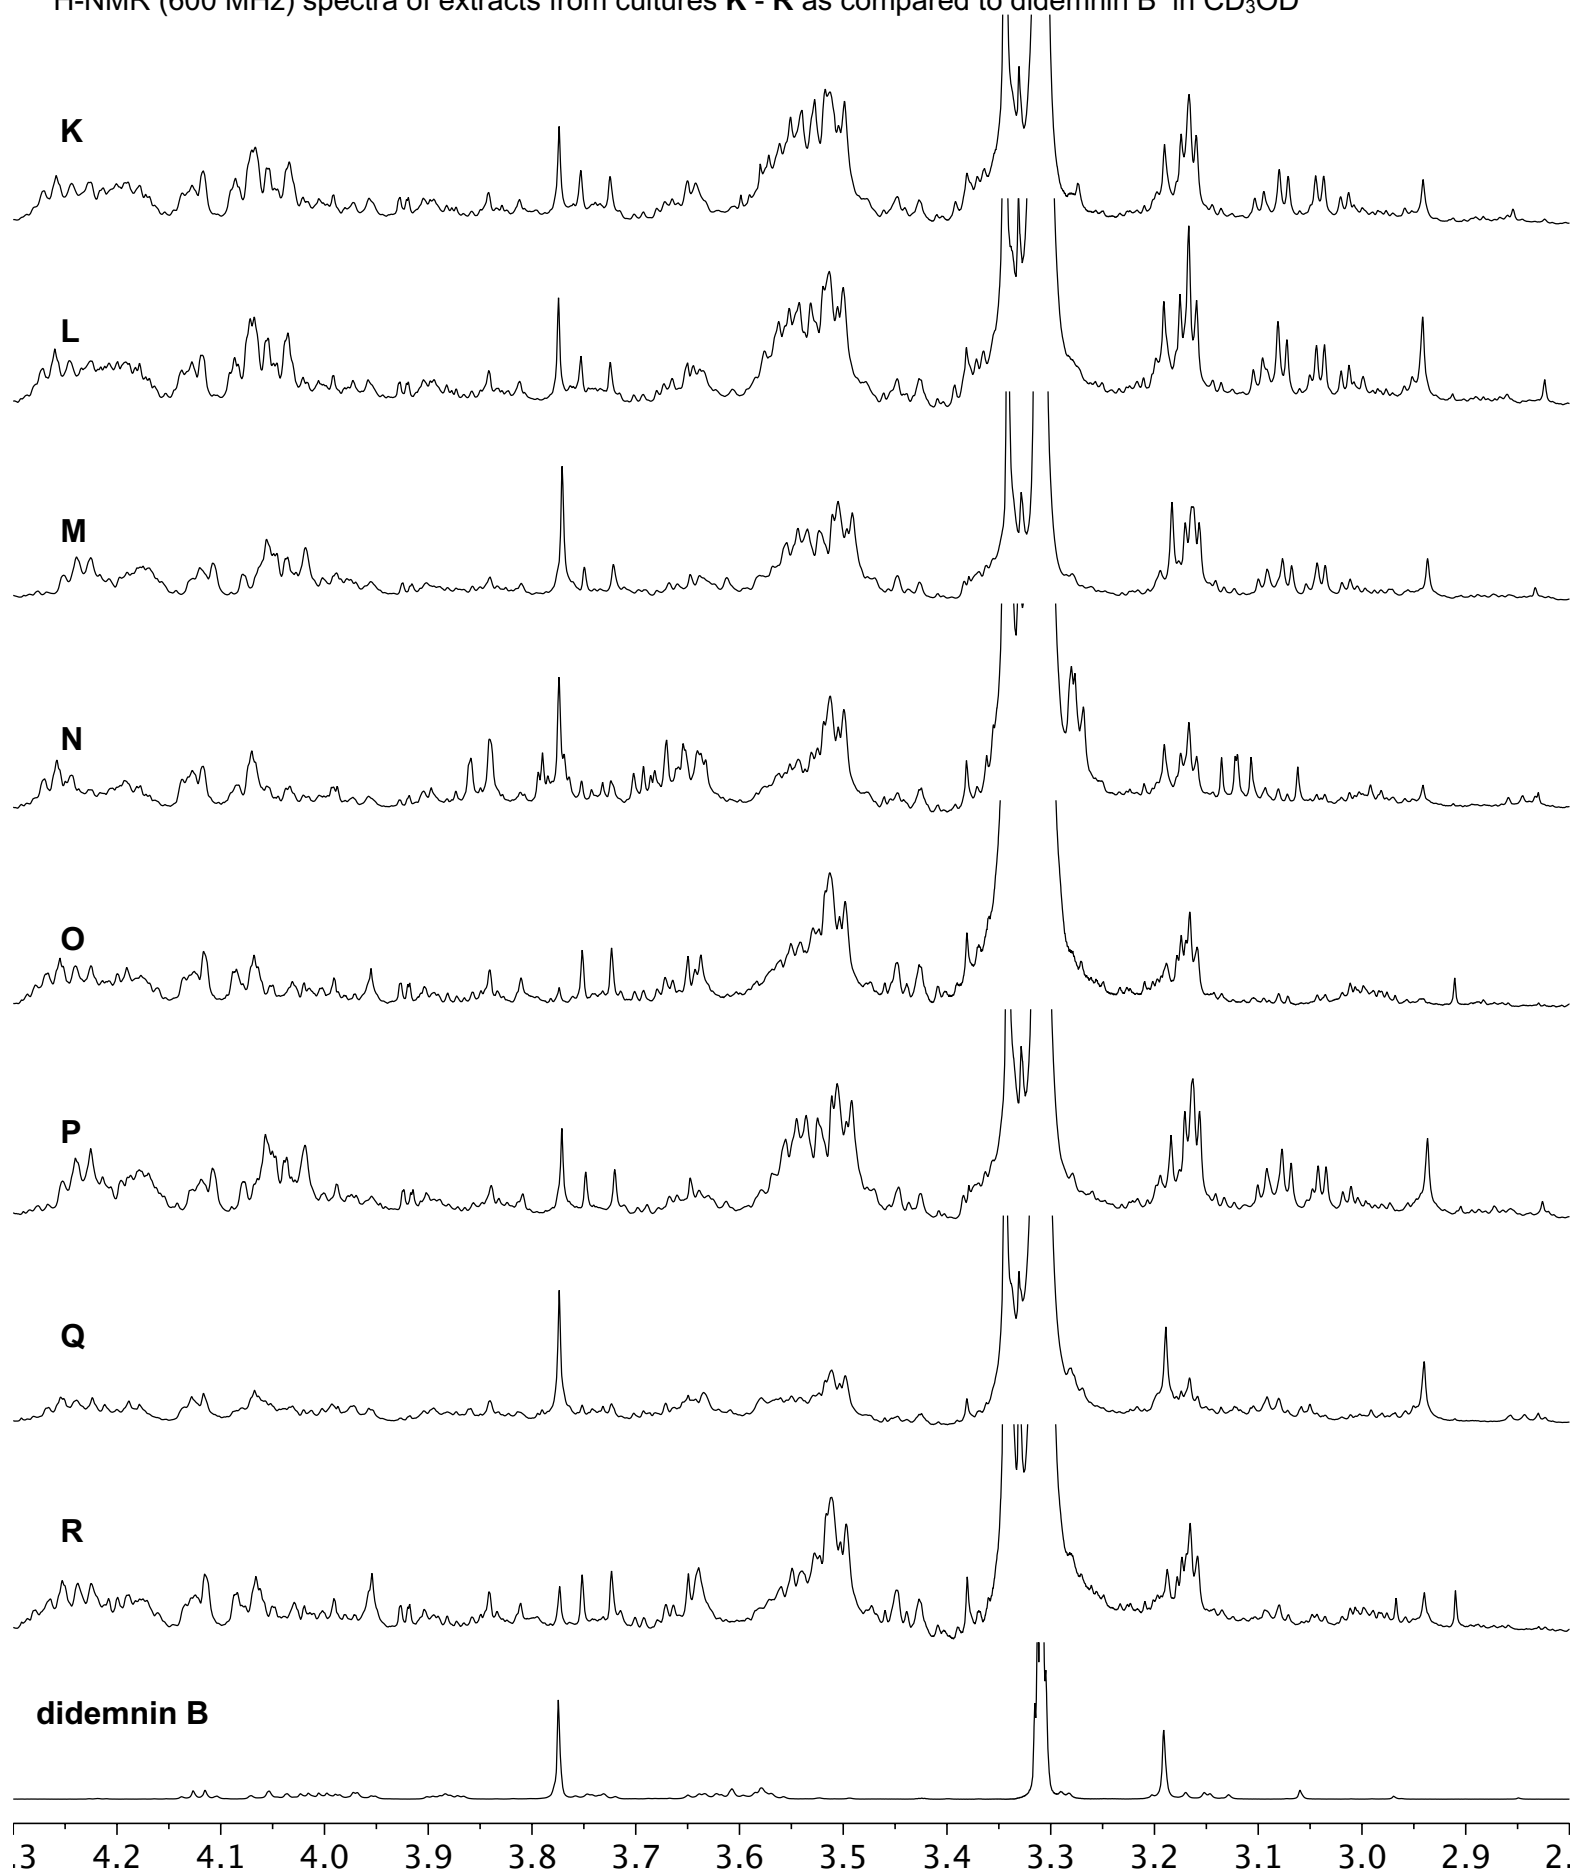

$^1\text{H}$ -NMR (600 MHz) spectra of extracts from cultures **K** - **R** as compared to didemnin B in  $\text{CD}_3\text{OD}$

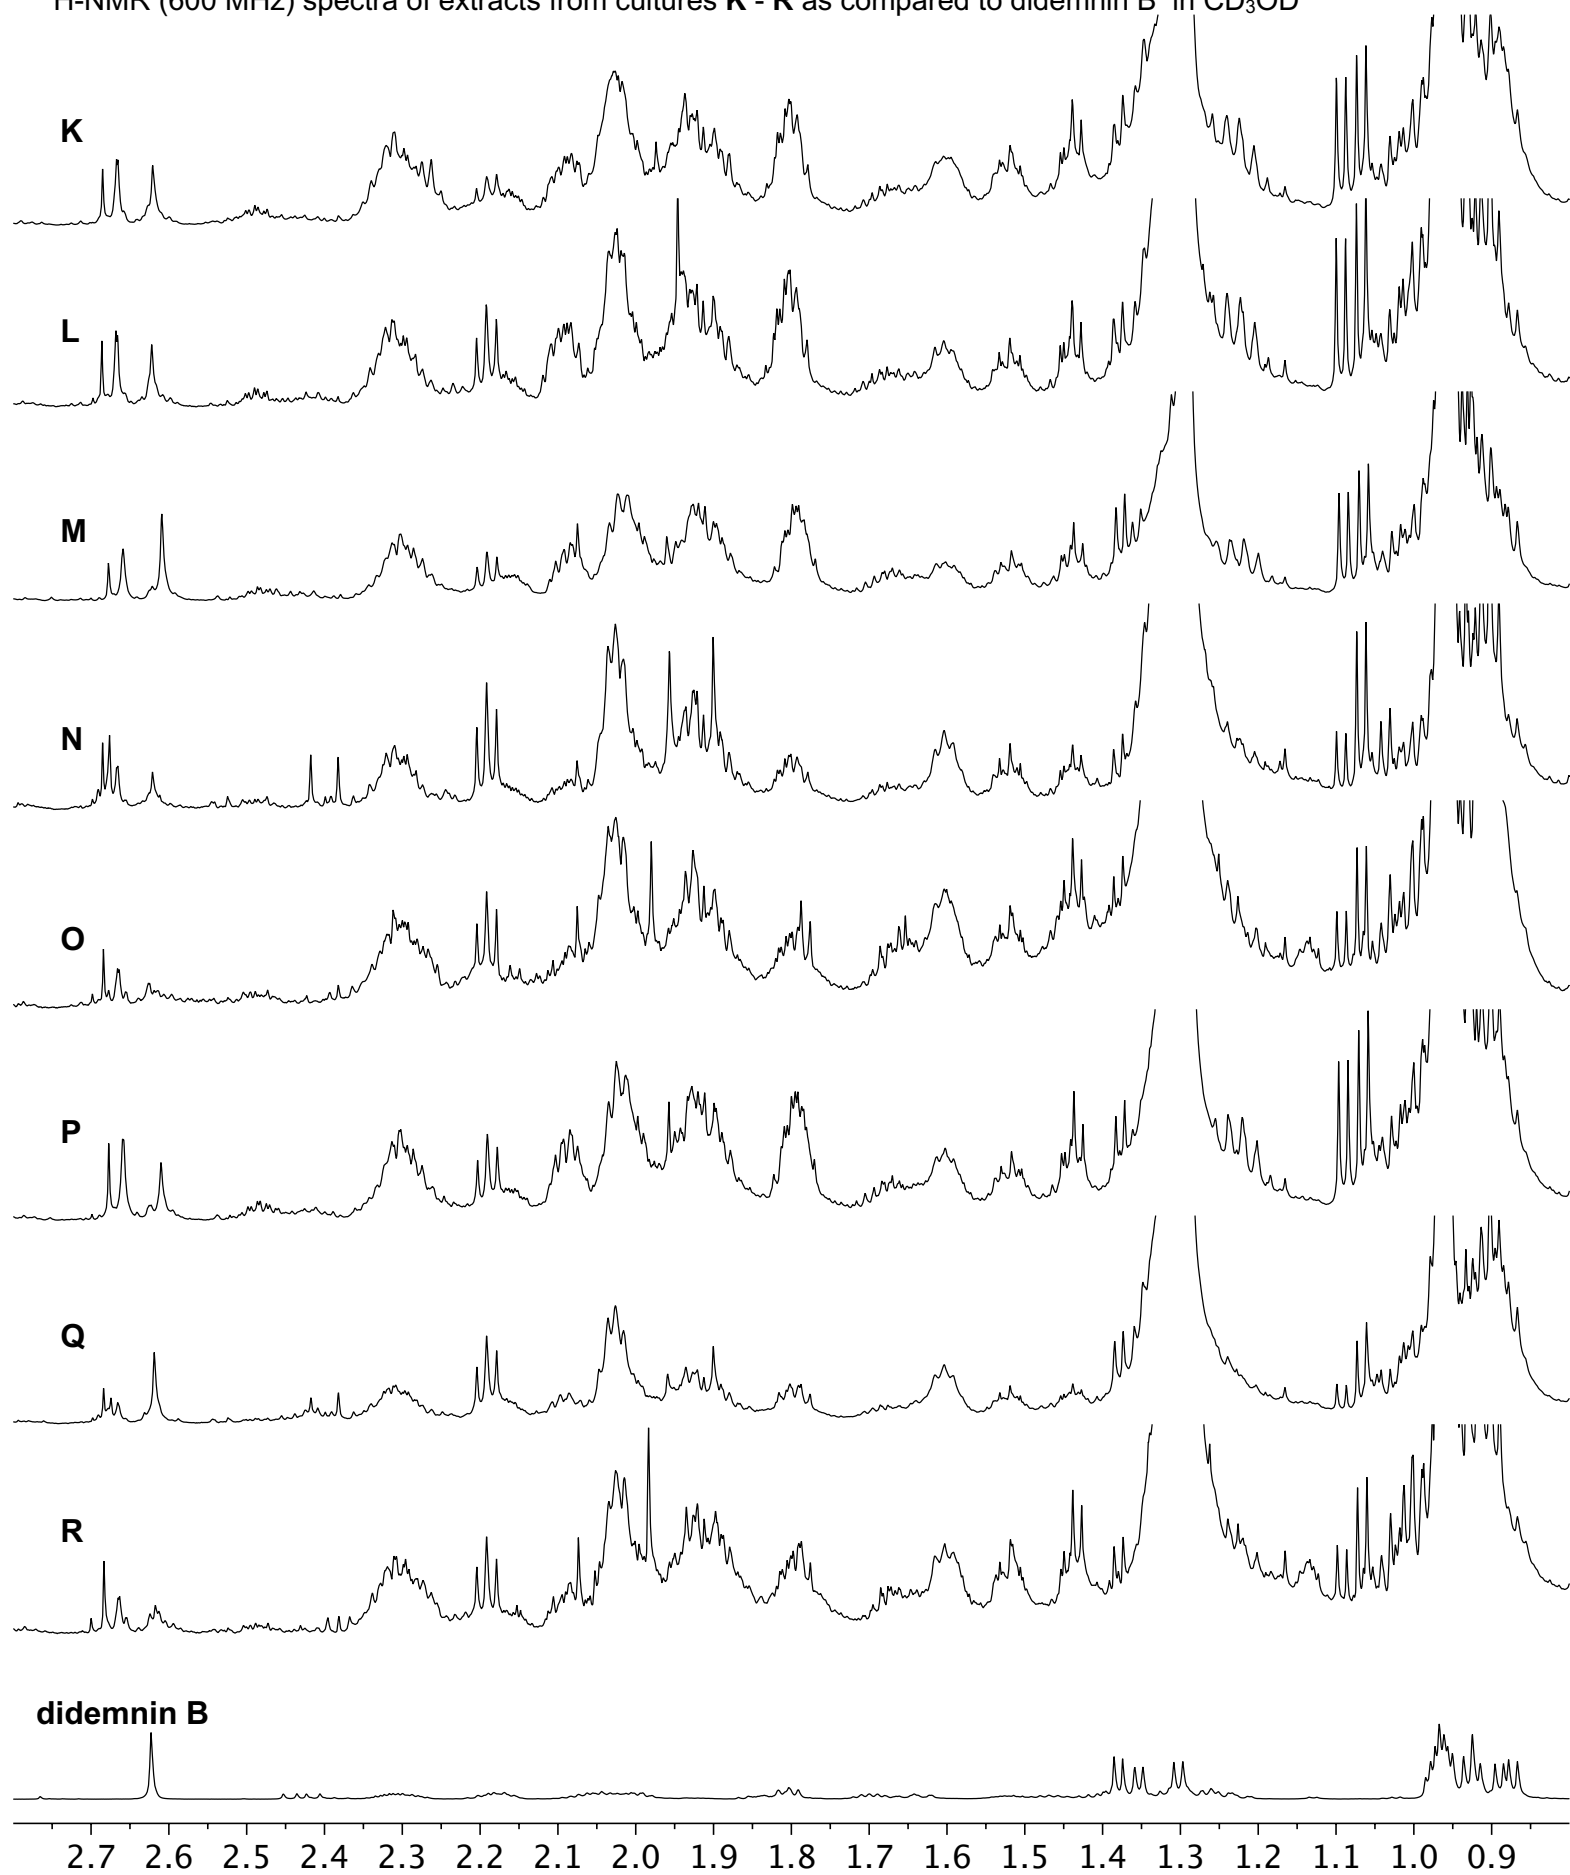

Supplement: s1 [file s1]
